# Supplementary material
Source: PubMed Central journal article supplement (PMC9913286)
Supplement: JSLHR-65-2881-s001.pdf [file JSLHR-65-2881-s001.pdf]

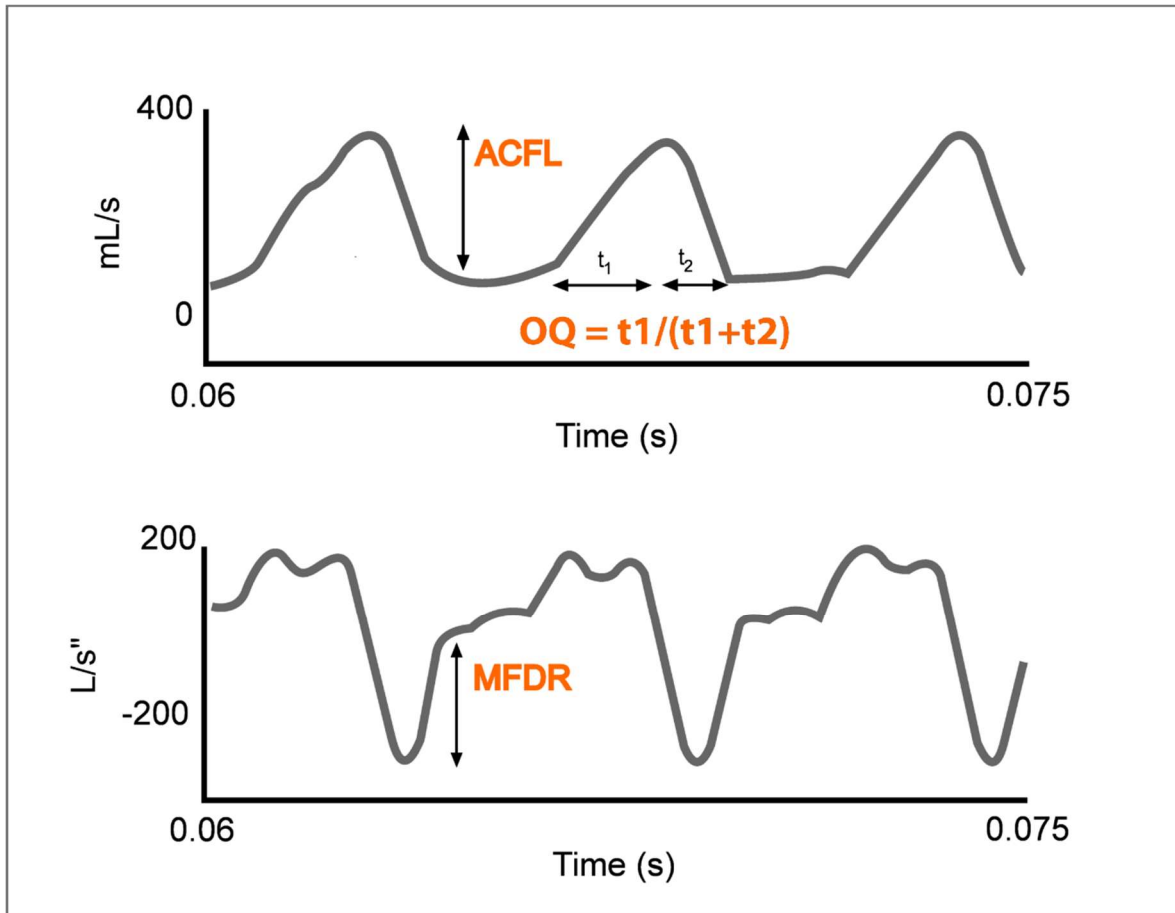

**Figure S1.** Estimation of the parameters ACFL, MFDR, and OQ from airflow waveform.

*Note.* All parameters were estimated from the airflow waveform. The ACFL corresponds to amplitude peak to peak. MFDR is the absolute negative peak of the first derivative of the airflow waveform; and OQ, is defined as the ratio of the open phase to the total cycle duration, wherein the open and closure time points were obtained at 5% amplitude between the minimum and peak flow to minimize the effect of closed-phase ripples. Adapted from Espinoza et al. (2017).
