# Supplementary material
Source: PubMed Central journal article supplement (PMC9913286)
Supplement: JSLHR-65-2881-s002.pdf [file JSLHR-65-2881-s002.pdf]

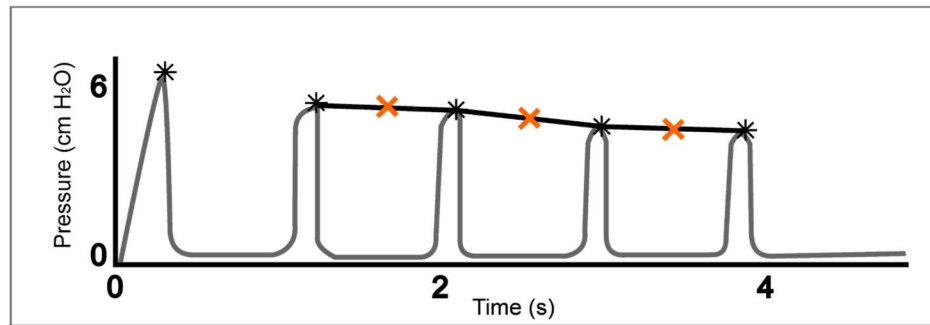

**Figure S2.** Estimation of the subglottic pressure from the intraoral pressure oral signal. Intraoral pressure for five /pae/ syllables showing peak values as orange asterisks and interpolation lines indicating estimated subglottal pressure halfway between peaks. Adapted from Espinoza et al. (2017).
