# Supplementary material
Source: PubMed Central journal article supplement (PMC9913286)
Supplement: JSLHR-65-2881-s004.pdf [file JSLHR-65-2881-s004.pdf]

**Figure S4.** Estimation of the parameters AP and AA from the digital kymograph obtained from HSV.

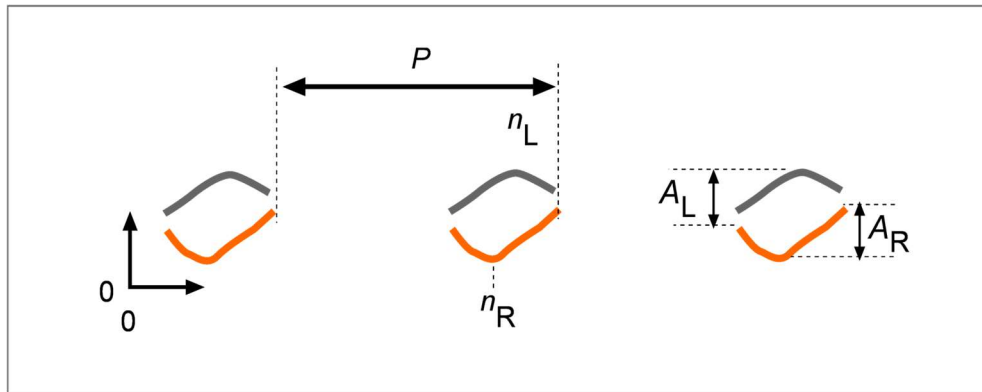

*Note.* Parameterization of lateral displacement waveforms to obtain measures of vocal fold vibratory asymmetry. Adapted from Mehta et al. (2011).
