# Supplementary material
Source: PubMed Central journal article supplement (PMC9913286)
Supplement: JSLHR-65-2881-s006.pdf [file JSLHR-65-2881-s006.pdf]

**Table S2.** Mean values and standard deviations for SPL-normalized measures.

| <b>Condition</b>               | <b>Typical</b> | <b>NPVH</b> |
|--------------------------------|----------------|-------------|
| <b>ACFL' (mL/s)</b>            |                |             |
| <b>Baseline</b>                | 1.77 (0.03)    | 1.69 (0.02) |
| <b>Lombard</b>                 | 1.79 (0.03)    | 1.68 (0.03) |
| <b>Recovery</b>                | 1.76 (0.04)    | 1.68 (0.03) |
| <b>MFDR' (L/s<sup>2</sup>)</b> |                |             |
| <b>Baseline</b>                | 1.67 (0.03)    | 1.61(0.02)  |
| <b>Lombard</b>                 | 1.65 (0.03)    | 1.55 (0.03) |
| <b>Recovery</b>                | 1.68 (0.04)    | 1.60 (0.02) |
| <b>OQr' (%)</b>                |                |             |
| <b>Baseline</b>                | 1.22 (0.2)     | 1.01 (0.2)  |
| <b>Lombard</b>                 | 1.47 (0.2)     | 1.29 (0.3)  |
| <b>Recovery</b>                | 1.21 (0.2)     | 1.175 (0.2) |
| <b>SGP' (cmH20)</b>            |                |             |
| <b>Baseline</b>                | 4.73 (0.4)     | 4.35 (0.3)  |
| <b>Lombard</b>                 | 4.48 (0.6)     | 4.22 (0.5)  |
| <b>Recovery</b>                | 4.59 (0.5)     | 4.47 (0.4)  |

*Note.* ACFL' = normalized unsteady peak-to-peak airflow amplitude; MFDR' = normalized maximum flow declination rate; OQf' = normalized flow-based laryngeal open quotient; SGP' = normalized subglottal pressure.
