# Supplementary material
Source: PubMed Central journal article supplement (PMC9913286)
Supplement: JSLHR-65-2881-s007.pdf [file JSLHR-65-2881-s007.pdf]

**Table S3.** Mean values and standard deviations for vibratory measures.

| Measure/<br>Condition | Posterior glottal portion |              | Middle glottal portion |              | Anterior glottal portion |                 |
|-----------------------|---------------------------|--------------|------------------------|--------------|--------------------------|-----------------|
|                       | Typical                   | NPVH         | Typical                | NPVH         | Typical                  | NPVH            |
| OQ <sub>w</sub> (%)   |                           |              |                        |              |                          |                 |
| Baseline              | 44.1 (15.3)               | 39.8 (10.2)  | 38.8 (10.8)            | 38.1 (10.7)  | 41.8 (11.3)              | 44.8 (10.5)     |
| Lombard               | 45.6 (10.5)               | 56.6 (17.8)  | 47.6 (7.4)             | 51.3 (13.5)  | 54.1 (12.8)              | 66.0 (19.6)     |
| Recovery              | 56.9 (20.2)               | 72.2 (14.7)  | 21.1 (21.0)            | 61.5 (19.0)  | 62.7 (23.1)              | 76.9 (22.6)     |
| SQ <sub>w</sub> (%)   |                           |              |                        |              |                          |                 |
| Baseline              | 106.8 (54.9)              | 114.3 (29.6) | 99.4 (33.4)            | 105.7(27.1)  | 105.1(29.8)              | 95.3 (33.4)     |
| Lombard               | 95.8 (44.3)               | 119.1 (33.0) | 99.2 (33.4)            | 105.7(27.1)  | 84.6(26.7)               | 120.4<br>(40.2) |
| Recovery              | 86.4 (36.6)               | 120.1 (48.3) | 88.6 (26.9)            | 120.4(42.3)  | 80.2(18.3)               | 111.2<br>(43.6) |
| PA (%)                |                           |              |                        |              |                          |                 |
| Baseline              | -0.12(0.40)               | 0.25 (1.29)  | 0.22 (0.56)            | 0.30 (0.67)  | -3.79 (10.01)            | -1.37 (3.97)    |
| Lombard               | -0.26(0.67)               | 0.11 (0.49)  | -0.08 (1.36)           | 0.09 (0.60)  | -1.28 (2.86)             | -0.82 (1.57)    |
| Recovery              | -0.65(1.50)               | 0.67 (1.06)  | -0.12 (2.15)           | 0.81 (2.23)  | -0.56 (1.78)             | -0.71 (1.38)    |
| AA (%)                |                           |              |                        |              |                          |                 |
| Baseline              | 111.9 (13.3)              | 108.6 (19.2) | 125.8 (38.2)           | 106.9 (17.3) | 114.7 (19.7)             | 111.6 (19.5)    |
| Lombard               | 100.1 (18.1)              | 97.3 (18.2)  | 108.2 (21.8)           | 97.5 (15.5)  | 114.2 (19.6)             | 107.3 (20.5)    |
| Recovery              | 98.42 (10.4)              | 101.5 (18.1) | 99.2 (14.2)            | 107.9 (29.8) | 104.9 (19.5)             | 108.1 (17.3)    |

*Note.* OQ<sub>w</sub> = width-based open quotient; SQ<sub>w</sub> = width-based speed quotient; PA = phase asymmetry; AA = amplitude asymmetry.
